# Supplementary material for: A Novel Model Based on Necroptosis-Related Genes for Predicting Prognosis of Patients With Prostate Adenocarcinoma
Source: PubMed Central journal article supplement (PMC8802148; doi:10.3389/fbioe.2021.814813), 2022-01-11

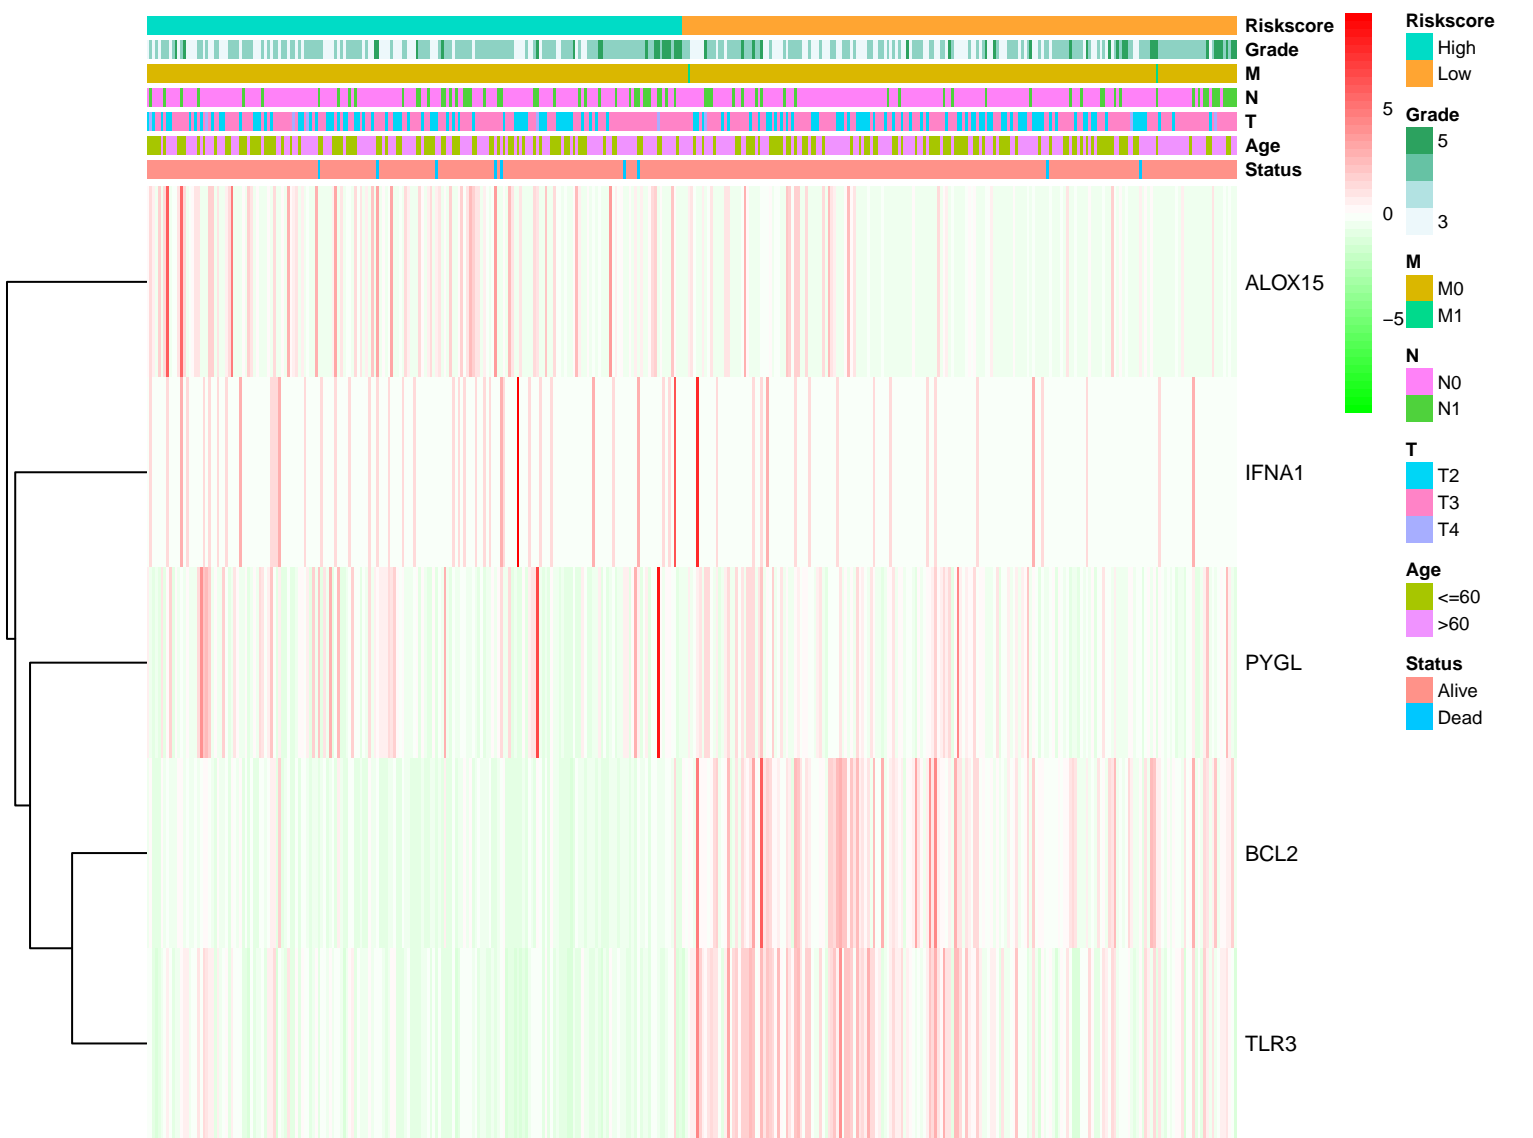

Supplement: Image1.pdf [file Image1.pdf]
